# Supplementary material for: Linking Human Perceptions and Spotted Hyena Behavior in Urban Areas of Ethiopia
Source: Animals (Basel). 2020 Dec 15;10(12):2400. doi: 10.3390/ani10122400 (PMC7765435; doi:10.3390/ani10122400)
Supplement: Supplementary file 1 [file animals-10-02400-s001.xlsx]

## Sheet: FID
Supplemental Table 1. Raw flight-initiation-distance data. NoHyenas=number of hyenas present at start of FID; ActivityStart=activity of hyenas at start of FID; ChangeBehavior=time at which they changed to a new behaviorduring FID; FID=time at least one hyenas fled, with details of how many fled vs stayed
Date	Time	Location	Loc	Lat	Lon	NoHyenas	Sex	Age	DistStart	ActivityStart	Habitat	DistSawHuman	DistChangeBehav	NewBehav	FID	FIDBehav	DistStop	StopBehav	CompleteTest	GroupFled	NoFled	NoStay	Comments
2017-08-02	18:33:00	Mekelle church forest	37P	0551267	1483895	3	unk	adult	41	walkslowly	forest, road	41	41	vigilant	30	walkedaway	unk	unk	yes	yes	3	0	went back into forest so didn’t see after behavior
2017-08-02	19:00:00	Mekelle church forest	37P	0551267	1483895	5	unk	adult	45	layingdown	forest, road	45	35	vigilant	30	fastwalk	35	vigilant, interactwithhyena	yes	no	4	1	1 adult didn’t fid
2017-08-03	19:05:00	mekelle landfill	37P	0546514	1493830	7	unk	unk	200	rest	open river bottom	60	40	walkedtowardstester	25	runaway	35	stood	yes	yes	6	1	1 was hidden behind hillslope so may not have seen us when others fled
2017-08-03	18:45:00	mekelle landfill	37P	0546514	1493830	7	unk	adult	200	rest	open river bottom	150	150	vigilant	35	walkedaway	45	investigate, sniffground	yes	no	1	6
2017-08-06	21:18:00	Mekelle, vetschoolroad	37P	0550341	1487393	1	unk	adult	125	walk	hillslope, open	125	125	veeraway, run	125	veeraway, run	unk	unk	no	na	na	na	while trying to climb hill it detected us so that we were no longer approachingat appropriate angle for FID test as it started veering away, 1 other hyena whooping nearby
2017-08-06	20:29:00	Mekelle, vetschoolroad	37P	0550373	1485604	1	unk	adult	125	walkslowly	road, open	100	75	slowwalk	17	walkedaway	20	vigilant, than walked again	yes	na	na	na
2017-08-06	20:14:00	Mekelle, vetschoolroad	37P	0550163	1486271	4	unk	mix	75	walkslowly	road, shrubs	50	45	scratchself	20	walkedaway	na	na	yes	yes	2	2	all 4 eventually fled but only 2 at FID, the other 2 were farther away and likley fled because driver turned on lights.
2017-08-06	19:32:00	mekelle	37P	0549395	1484792	2	unk	unk	50	fastwalk	open roadside	30	na	na	25	runaway	na	na	no	yes	2	0	veered walk
2017-08-06	19:40:00	mekelle	37P	0549395	1484792	1	unk	unk	150	fastwalk	open roadside	125	na	na	100	walkedaway	na	na	no	ns	na	na	veered walk
2017-08-06	19:42:00	mekelle	37P	0549395	1484792	2	unk	unk	100	fastwalk	open roadside	80	75	vigilant	70	walkedaway	na	na	yes	yes	2	0
2017-08-08	21:48:00	Harar	38P	0186252	1029593	1	unk	adult	25	walkslowly, stop	road	25	17	walkaway	17	walkedaway	na	na	yes	na	na	na	was walking same direction we drove, slowly but stopped when we drove up and turned to be ~perpindicular of us, so cinducted FID. 1st detect was detect vehicle.
2017-08-08	22:22:00	Harar	38P	0186252	1029593	21	mix	mix	35	layingdown/vigilant	roadside, dirt	35	25	stoodup	23	runaway	26	slow walk	yes	yes	2	0	more in area but 2 in direction of test
2017-08-09	23:42:00	HararDump	38P	0185902	1030011	1	unk	adult	35	openingbagtoeat	road, dumpsite	9	7	runaway	7	runaway	7	vigilant	yes	na	na	na
2017-08-09	22:09:00	Harar	38P	0186224	1030318	1	unk	adult	25	layingdown	wall(fence) by road	25	20	stoodup	18	walkedaway	unk	unk	yes	na	na	na	detected car first, could not see what it did after since up above wall.
2017-08-09	20:45:00	Harar	38P	0187667	1030555	3	unk	unk	25	walk, stopped	road, thick shrub at edge	25	10	veeraway, walk	8	fastwalk	10	slow walk	yes	yes	2	1	1 was on opposite side of road so 'stuck' there trying to pass me and ran when I was within 5 m of it.
2017-08-11	23:20:00	Harar, crossroadsNorth	38P	0187667	1030555	1	unk	adult	40	walkslowly	road	40	33	walkaway	33	walkedaway	36	circledback	yes	na	na	na	walked away but then immediately circled back to continue original path just a few meters beyond distance of FID
2017-08-11	23:01:00	HararDump	38P	0185902	1030011	2	unk	adult	50	eatfromdumpster	road, dumpsite	50	10	walkaway	10	walkedaway	12	vigilant	yes	yes	2	0	just walked a bit into dumppile behind fence and then came back once I walked away
2017-08-12	21:50:00	HararDump	38P	0185897	1029979	1	unk	adult	40	investigate	road, trash	35	28	vigilant	20	walkedaway	na	na	yes	na	na	na	cat yowling near hyena at start, distracted hyena
2017-08-12	21:00:00	HararFeedingSite	38P	0187439	1029620	3	unk	adult	20	rest	open, hyena feeding site	15	na	na	4	walkedaway	6	vigilant, walked again	yes	yes	2	1	more than 3, probably 13 present but others are at feeding site and these three were resting in open field
2017-08-12	18:50:00	HararFeedingSite	38P	0187439	1029620	1	unk	adult	50	walk	open road, feeding site	50	40	stopped	20	walkedaway	22	vigilant to dog	yes	na	na	na
2017-08-12	20:38:00	HararFeedingSite	38P	0186252	1029868	1	unk	adult	40	walk	open shrub	35	25	moved	18	walkedaway	22	vigilant	yes	na	na	na	moved away but just to top of mound and then kept moving. First saw on road but it went off to side opne field and we were able to walk into open field to test.

## Sheet: playbacks
Supplemental Table 2. Raw data from playbacks. MinHyenas=minimum number of hyenas counted; DogPresent=yes(1)/no(0).
Date	StartTime	Location	Loc	Lat	Lon	CallType	Habitat	MinHyenas	DogPresent	Jackals	Comments
2017-08-10	18:46:00	Harar Church Forest and Cemetery	38P	0182062	1031984	hyena	cemetery, open with shrub	4	0	0
2017-08-02	20:12:00	Mekelle	37P	0550330	1485791	hyena	low grass, open, fields	32	1	1	dog = layingdown
2017-08-03	23:03:00	Mekelle, industry park	37P	0560446	1492257	hyena	open with woods nearby	22	1	0
2017-08-03	20:23:00	Mekelle, landfill	37P	0546514	1493830	hyena	landfill, shrub, river bottom nearby	37	0	0
2017-08-05	22:03:00	Mekelle, NE near river	37P	0553330	1495149	hyena	road, industry, river, field	0	1	0
2017-08-05	19:15:00	Mekelle, north	37P	0555924	1498122	hyena	mountain side scrub, road	3	0	0
2017-08-08	21:50:00	Harar, east	38P	0186252	1029593	hyena	road, shrub	23	1	0
2017-08-09	20:54:00	Harar, road north	38P	0187667	1030555	hyena	road, shrub, tree, river	5	1	0
2017-08-11	21:08:00	Harar, south mountain	38P	0183815	1029159	hyena	road, shrub, mountaintop	3	0	0	dogs slightly downhill, but not where we were
2017-08-16	20:05:00	Arbaminch	37P	0342959	0666220	hyena	forest, close to airport	0	0	0
2017-08-16	22:16:00	Arbaminch	37P	0339107	0666051	hyena	open area, river	0	1	0
2017-08-16	23:11:00	Arbaminch	37P	0338291	0662524	hyena	forest, river	3	0	0
2017-08-17	19:15:00	Nechisar NP	37P	0353198	0655000	hyena	open grassland	1	0	0
2017-08-17	21:15:00	Nechisar NP	37P	0350049	0660429	hyena	forest area near lake	8	0	0	hippo and zebra nearby
2017-08-17	20:18:00	Nechisar NP	37P	0351475	0658810	hyena	open grassland, campsite	0	0	0
2017-08-17	23:32:00	Nechisar NP	37P	0341070	0665818	hyena	forest	3	1	0
2017-08-18	20:32:00	Arbaminch	37P	0341315	0666830	hyena	forest	0	0	0
2017-08-21	22:58:00	AddisAbaba	37P	0341070	0665814	hyena	open area	3	1	0
2017-08-22	23:12:00	AddisAbaba	37P	0486596	1000690	hyena	open waste dump, road	0	1	0	lots of traffic
2017-08-22	00:18:00	AddisAbaba	37P	0485005	1001698	hyena	pen area, human settlement	19	0	0
2017-08-22	01:35:00	AddisAbaba	37P	0473539	1003744	hyena	road, forest area nearby, entoto	1	1	0
2017-08-24	21:38:00	AddisAbaba	37P	0475280	0991240	hyena	open area near human settlement	8	1	0
2017-08-07	21:43:00	Awash, northbynortheast	unk	unk	unk	hyena	scrub, thorn, road	2	0	1
2017-08-07	20:55:00	Awash, eastbysoutheast of road	unk	unk	unk	hyena	open, some shrubs, road	0	1	0
									1 = yes, 0 = no

## Sheet: puzzlebox
Supplemental Table 3. Raw data for puzzlebox tests. Lat=Latency; InteractTime=total time observed interacting with puzzle box; Nohyenas=Number of hyenas total that appeared during observation time; Stop=time stopped observation after hyenas left.
date	time	location	loc	lon	lat	Nohyenas	sex	age	bait	testtype	Stop	latApproach	latTouch	latApproachClosed	latTouchClosed	latEat	latSolve	LatEatClosed	IntereactTime	comments
2017-08-04	19:42:00	mekelle churchforet	37P	0550436	1485369	1	unk	adultwithyoung	rawmeat	paired	3875	1485	1668	1485	na	na	na	na	110	adult
2017-08-04	19:42:00	mekelle churchforet	37P	0550436	1485369	3	unk	adult	rawmeat	paired	3875	2710	2828	2710	3449	3133	na	na	1196	3 more appear, looks like 2 young with adult, adult touched rope at 1:01:34 & juvenile at 1:02:00. People walked up with flashlights and hyenas ran away at end
2017-08-04	19:42:00	mekelle churchforet	37P	0550436	1485369	1	unk	adultwithyoung	rawmeat	paired	838	462	na	462	na	na	na	na	na	2nddominant hyena showed up and 28 seconds latere first one left
2017-08-05	20:36:00	mekelle landfill	37P	0546514	1493830	1	unk	unk	rawmeat	paired	308	120	na	na	na	na	na	na	188	left at 5:08
2017-08-05	20:36:00	mekelle landfill	37P	0546514	1493830	6	unk	unk	rawmeatplayback	paired	2850	1005	na	1005	na	na	na	na	1555	atleast two young, man walked up and hung around distrubing hyenas and ending time
2017-08-09	21:38:00	Harar crossroads	38P	0187667	1030555	5	unk	unk	rawmeat	paired	1801	5	na	5	na	na	na	na	na	3 adults at first but 2 more came. Tuk tuk, person learning to drive was on road and hyenas kept runnnning away so stopped early. When went to pick up boxes 1 hyena was within 2 m but in ditch behind it and below road.
2017-08-09	22:16:00	Harar dumpsite	38P	0185941	1030048	8	unk	unk	rawmear	paired	3969	210	2347	249	2996	2347	na	na	795	cats prevent hyenas from eating and investigating for along time. Starts with 4 hyenas but jumps to up to 8 and at least 5 before they even challenge the cats. See data sheet for details. Cats fought back 5 hyenas for awhile before the hyenas fed
2017-08-10	21:43:00	hararBridgeRoad	38P	0186235	1029597	1	unk	unk	rawgoatmeatPlayback	paired	3742	884	1188	884	1125	1194	na	na	1092	3 first appear in repsonse to playback but leave without approaching box, 1 solo approaches box and eats, 1 solo appraoches box but only eats meat pulled out earlier and doesn't interact with box
2017-08-10	17:29:00	harar churchforest	38P	0182062	1031984	1	unk	unk	rawgoatmeat	paired	3600	220	381	261	na	399	na	na	274	1 more appears but just darts by at full run and doesn't interact or approach box. Runners in area, first two came by and hyena ran away into cornfield and didn't return. Another runner came by 1000 times after that
2017-08-10	23:14:00	Hararcrossroads	38P	0187638	1030523	4	unk	unk	rawgoatmeatPlayback	paired	5400	708	2090	708	878	2198	2390	na	2985	several times people walking by threw rocks and disrupted feeding/invetsigating of boxes. It was raining really hard and difficult to see but appears at least 1 hyena pulled on door but did not open completely so unable to get food from box
2017-08-11	22:15:00	hararBridgeRoad	38P	0186222	1029598	1	unk	adult	rawmeatCall	paired	1950	3	449	117	625	788	1669	1701	506	same 1 as yesterday?

## Sheet: NotesfromHumanSurveyWork
Supplementary Information 4. FGD and KII summary notes from Ethiopia August 2017, compiled by D. Layne Coppock.
Mekelle Area, August 01-06 (Translators were Mr. Berhe Gebru and Mr. Solomon Tesfaye)
Focus Group, August 02: Farming Village Called “Dagya” a few miles outside of Mekelle City.
13 participants total, including 5 males and 7 females. Ages range from 22 to 50. For education, 9 are illiterate, while the rest had exposure to formal education varying from 5 to 8 years. All are orthodox Christians, and all give their occupation as farmers. All are married. Numbers of people per household ranges from 3 to 10. Time spent living in this location ranged from 13 to 50 years. All f…
We skipped question 1 to save time. They all know each other anyway.
Direct personal experiences with hyenas? Yes. Hyenas have lived with communities here for many years in peace. They may occasionally kill livestock but do not bother humans. If we do not celebrate religious days, however, the problem of livestock attack occurs. Hyenas are our municipal service—they keep the environment clean. Hyenas also provide a security service for the village, because as long…
Indirect learning about hyenas? It is known that a few people have been eaten by hyenas in the region; some FG participants attended funerals of these victims. Also, unlike their situation, they are aware that hyenas in other places can negatively affect farming activities that occur at night. In other places people should not stay out overnight.
Personal opinions about hyenas? Hyenas are generally fearful. They are generally our friends. They can attack certain people if they are previously annoyed, or suffering prior attack, by or from that person. You should never cross over a pile of hyena vomit, as this act can cause disease or health risks for people. Hyenas are different from other wild animals because they can affect people’s live…
Personal opinions about hyena management? There have been no attempts to manage hyenas. No use of hyenas here for tourism. Hyenas are simply desired for helping keep a clean environment. There are no health related problems for people caused by hyenas. They may not be so good for tourism because it is not good (easy?) to see them and they smell bad. For security we need well-built homes.
Anything else important about hyenas? Because hyenas move at night and in waste areas, this is related to sin or shaytan. If a hyena sees you before you see it, you can become ill. This is related to sin. We do not believe that hyenas are buda or buda are hyenas. If you are shaded by hyenas this can affect you because you cannot speak. This condition can be cured with holy water. There is an old …
This FGD took 70 minutes.
Focus Group, August 03: Farming Village Called “Adikelomay” near the Mekelle city landfill
12 participants total, including 6 males and 6 females. Ages range from 18 to 70. For education, 5 are illiterate, while the rest had exposure to formal education varying from 5 to 12 years. All are orthodox Christians, most (8) give their occupation as farmers, with others listing guard, driver, construction, or being a contractor. Three are married, 6 are single, and 3 are widowed or divorced. …
We skipped question 1 to save time. They all know each other anyway.
Direct Personal experiences with hyenas? Yes. They do not harm people here or disturb our daily activities. No effects on human health or safety. The main way they affect our livelihood is crop and pasture damage associated with trampling during sexual activity or if they sleep or play in the fields at night; this can be an important problem. Hyenas do not harm our dogs or livestock. No disease i…
Indirect learning about hyenas? No. We have not heard any bad news about hyenas from elsewhere. Hyenas may harm people if and only if people attack hyenas first.
Personal opinions about hyenas? Repetition as above. We differentiate between hyenas and other animals because hyenas are wild and live in the forest. We do fear them.
Personal opinions about hyena management? Hyenas transmit disease among themselves but not to people. We do not want hyenas to be destroyed because they are useful to clean the environment. We want to increase the number of hyenas; we want them to live in the protected forest.
Anything else important about hyenas? Add to personal experiences above… there is personal experience that if a person kills a young hyena, hyenas will kill livestock owned by that person. An example is a donkey killed one day after a FG participant killed a young hyena. If you do not harm hyenas, they will not harm you.
If a person is out at night and a hyena sees the person before the person sees the hyena, the person’s body can fill up with “something bad.” The person can become ill, feel discomfort, unable to speak or call for help, or legs can be paralyzed. The hyena is the “horse of shaytan” (satan rides the hyena; the hyena is a messenger for shaytan). If, however, the person sees the hyena first, the pers…
How do people learn to behave around hyenas? From life experiences in and near the village; information about hyenas is passed across generations.
The hyenas are part of our wealth; hyenas help keep our environment clean. Without hyenas, human physical health may suffer from an unclean environment. The participants felt that they do not want hyenas eliminated. If the waste dump is gone, however, hyena numbers could be reduced.
Dogs also cause crop damage from running in the fields. This FGD took 60 minutes.
Focus Group, August 03: Urban Location in Mekelle city Called “Adha.”
12 participants total, including 6 males and 6 females. Ages range from 18 to 55. For education, 1 is illiterate, while the rest had exposure to formal education varying from 3 to 9 years. All are orthodox Christians, 5 give their occupation as traders, 1 each as a daily laborer, handcrafts, farming, government employee, and other. Six are married, 4 are single, and 2 women are widowed. Numbers o…
We skipped question 1 to save time.
While the participants are currently urbanites, much of the information generated was derived from their experiences living in rural areas prior to moving to town.
Direct personal experiences with hyenas?
Most participants had direct experience with hyenas. Hyenas eat livestock. One saw hyenas eating humans when he was a fighter (for the TPLF.) Wounded people may be eaten by hyenas. Hyenas are case sensitive; they respond in kind as how you treat them. If a hyena has bitten livestock, Christians are not permitted to eat that animal; they can sell the animal to Muslims. Animals do not recover from …
Indirect learning about hyenas?
Hyena can affect the young and the elderly. They never eat the hands, legs, or heads of victims. They heard of a man who killed a hyena, and then hyenas killed his donkey and a sheep. Hyenas also prevented his family form making a peaceful move. They obtained information from friends and relatives. Hyenas attack weak people or children at night. If hyenas are shot they will take
revenge; they prevented a man’s family from entering or leaving their home. The man asked forgiveness from hyenas by bringing meat and then he was free of revenge after that.
Personal opinions about hyenas?
A female child (age 4) was bitten and eaten at Kebele 18 in town. What remained was the head, leg, and hand. Hyenas receive special treatment, but they pose danger. Hyenas are blind during the day.
Personal opinions about hyena management?
No animal is harmful in general. Animals should not be destroyed, including the hyena. They are good and bad to people. They are God’s creature we must protect. They keep our environment clean. We can use them for tourism. They even bring foreign researchers to Ethiopia who bring foreign exchange (!) Hyenas are part of our wealth; with some disagreement, the majority feel that hyenas are benefici…
Anything else important about hyenas?
Older people say hyenas are the devil or shaytan’s younger brother/sister as it moves at night. Buda and hyenas are highly linked. Buda-affected people reflect a hyena’s voice (laughing, shouting, etc) when they are ill; buda-influenced hyenas are stronger than normal hyenas. A buda-influenced hyena can bite someone, and then this victim becomes strong and hard to subdue (as in a possession?). Th…
Livestock bitten by hyenas are not cured with modern medicine; they can be saved by traditional medicine using “mud.”
Hyenas are characterized by 2 things: They are case-sensitive (react to people based on how they are treated), and they promote peace
Hyenas are blind during the day but see well at night. Hyena’s back left leg is handicapped.
Hyena was too fast an animal, so God shortened one left leg to make it slower.
Hyena meat/left leg can bless agricultural production; kidney/bladder used for “buda treatment,” lips as a human love-attractant; left bone used for bone ailments; skin used to treat malaria before modern treatments
Participants agreed that hyenas affect people adversely when they face food shortages.
Drivers have been attacked in a couple places at night; evidence was the heads, hands, and legs. This FGD lasted 85 minutes.
Key Informant Interview August 04: Mekelle City Municipal Building
In this case only two professional men made up the FGD. In this case, we concentrated on questions 6 and 7 of the KII interview form. The logic was that soliciting professional views on hyenas was most critical, and we wanted to expedite the process given both men participated during their working hours. The interview lasted 40 minutes.
Do you have opinions about hyena management?
Hyenas are big municipal stakeholders. They primarily assist with garbage control.
They also play a role in environmental conservation and rehabilitation in the countryside near the city. For the latter, large degraded, formerly open-access hillsides have been recently designated as no use areas by government for livestock and people to exploit. This policy is part of a “green economy” policy of Ethiopia, and is intended to allow for vegetation recovery. Hyena dens are often lo…
With regards to disease transmission, hyenas and people are not in close physical proximity to each other. Disease transmission to people is thus not observed. Dogs are an important disease vector to people, however, with rabies as an example. There are no adverse effects of hyenas on human health. Feral dogs are killed in controlled campaigns. They are poisoned, but a low dose is used to prevent…
Despite that no disease issues with hyenas are perceived, they welcome research on the topic.
Other aspects of hyenas: Government policy prohibits killing hyenas. The overall benefits of hyenas to society here outweigh the costs. Citizens are aware that hyenas are potentially dangerous and hence people reduce risks to themselves. Local people believe that horses are not affected by hyenas; donkeys are vulnerable, however. Hyenas never attack people here.
Farmers are aware that hyenas may kill livestock that are not adequately protected by corral structures in villages or that wander alone.
Some hyenas may also reside in some undeveloped sites in or near the city. Open defecation by people does occur in some undeveloped locations. These locations may also receive other organic refuse. Hyenas may visit these locations, but they are searching for meat or bones, not human waste.
Perhaps unlike Addis Ababa, the Mekelle municipality collects household waste at the doorstep. This is carried out on a schedule via collaborations with private or cooperative micro-enterprises that provide labor and operate the trucks. There are 24 trucks overall, and trucks vary by sub- location in the city depending on population density. Garbage collection occurs twice per week, with one cycl…
This FGD took 40 minutes.
Focus Group, August 05: Muslims at Mekelle Mosque
Seven participants total, all men. Ages range from 35 to 72. For education, all are illiterate except for one who had 2 years of formal schooling. All are Muslims. Four gave their occupation as farmers, with three others listing mosque manager, trader, and “employed.” Five are married and two divorced. Numbers of people per household ranges from 1 to 9. Time spent living in this location ranged f…
We skipped question 1 to save time.
Note also that much of the information conveyed in this FGD was from a “religious teachings” perspective.
Direct personal experiences with hyenas?
Hyenas eat people and livestock. If livestock are wounded by hyenas, we can kill the animals and eat them. Muslims can even eat a hyena. Hyenas affect the health and life of people.
Indirect learning about hyenas?
Hyenas have affected many people in southern Tigray. Examples of rural school teachers and children eaten. Hyena behavior varies by site. For example, in southern Tigray hyenas tend to be fearless, while those in other areas can be shy. Hyenas seek revenge. For example, one fellow killed a hyena, and later the hyena threatened the killer’s entire family.
Personal opinions about hyenas?
Hyenas bit people and kill them. Even if a person survives, they become unproductive. Hyenas smell bad and if their shadow is cast on a person, the person becomes unhealthy. Dogs differ from hyenas. If a dog bites you, Islam recommends that you wash the bite 7 times, with the last time using soil and water. But no such problem with hyenas. (dog bites are worse than hyena bites)
Personal opinions about hyena management?
Islam promotes conservation of hyenas, but the younger generation (and some elderly) have challenged this idea recently. The majority of them advocate that the disadvantages of hyenas outweigh the benefits. The contributions of hyena are insignificant in terms of waste management or tourism. Otherwise, hyenas affect lives and health. (cost exceeds benefits).
Anything else important about hyenas?
If a buda hits another buda with a stick, the buda who is struck becomes a hyena. This hyena then goes anywhere it needs to perform tasks for buda. The hyena obeys buda. People can be transformed into things like a cooking pot, a stick, donkey, etc. If a buda wants to affect or kill a normal person, the buda uses a rolled leaf from a deciduous tree and then changes the person into an object or an…
This FGD lasted 60 minutes.
Focus Group, August 06: Orthodox Christian leaders (priests and deacons) at Mekelle Church
13 participants total, all males. Ages range from 21 to 75. For education, 3 were illiterate, while the rest had exposure to formal education varying from 8 years to a BA degree. All are orthodox Christians. Eight gave their occupation as church service, while three had government jobs, with 2 traders. Five were married were the rest single. Numbers of people per household ranges from 1 to 9. Tim…
We skipped question 1 to save time.
Note that some information supplied reflects “religious teachings.”
Direct personal experiences with hyenas?
Hyenas affect lives of people and livestock because they are carnivores. Hyenas carry (support) 44 shaytans (evil spirits). Hyena saliva can affect your health. Hyenas especially attack your property if you attempt to influence them. They clean the environment. Orthodox Christianity prohibits people from consuming animals affected by hyenas. Hyenas also smell very bad.
Indirect learning about hyenas?
A woman in a church was eaten by a hyena while she was washing with holy water. They heard of this from relatives. In another district, they heard of a hyena-affected man who is still living with side effects of an attack—he has only one leg.
Personal opinions about hyenas?
From a biblical perspective, hyenas differ from other animals because they are “shaytan’s horse.” While other wild animals can easily be tamed, the hyena is different. The church does not appreciate hyenas. The cost of hyenas exceeds the benefits. Lions and even snakes have positive roles in orthodox history. Not hyenas.
Personal opinions about hyena management?
Hyenas can make you speechless if they detect you before you detect them. Environmental degradation and deforestation will reduce hyena numbers. Scientific research is needed to examine health effects of hyenas. You can minimize the health risks associated with hyenas. You can keep your distance from them. Hyenas can also be poisoned.
Anything else important about hyenas?
Hyena meat and skin is a medicine to treat buda’s bad spirit. Hyenas take revenge. Killing a hyena results in unexpected responses from organized groups of hyenas. This will not stop unless you go to church and say “sorry” to the holy trinity. Hyenas equate to a buda. Budas can be a hyena. One priest shared his experience: He was keeping goats; a man approaches and the man, changes into a hyena, …
This FGD lasted 80 minutes.
Harar Area, August 08-13 (Translator Mr. Aman Daud)
Key Informant Interview, August 09: Harar Jugol Municipal Building
In this case this man was given a condensed interview. He is Muslim and spoke English.
The interview began by the respondent speaking spontaneously about hyenas in Harar. He noted the history; there has been an “agreement” for mutual tolerance between society and hyenas here for over 1,000 years. Hyenas and people were in conflict, and to solve the problem some people prepared porridge with butter for the hyenas; this coincided with the emergence of the holy shrines in the city. To…
There are tourist data at the federal level that indicate Harar is the destination for 30% of international tourists coming to Ethiopia. The data source was not clear.
Do you have opinions about hyena management?
He noted that the current hyena population is OK; more hyenas could be a problem, however, in case there is a food shortage. There is currently no information on hyena disease issues. There is no written policy for hyena management; there is just a “tacit agreement” on how to move forward.
We built structures to display hyena feeding, but these have gone unused.
Harar, like other municipalities, occasionally poisons feral dogs. There is concern that if hyenas can dig up the dog carcasses, they may also be poisoned.
Other aspects of hyenas:
The local Muslims believe that hyenas are needed to eat jinis (evil spirits). Hyenas cannot fully digest jinis, so hyena vomit can contain evidence of jini remains.
Some people understand the “hyena language.” If they reveal hyena secrets to others, they will be killed and eaten.
As hyenas lose natural habitat, they may increasingly seek refuge among people in the city. Hyenas can give birth in people’s homes; hyenas can be tamed like a dog. Hyenas can eat “halawa” (a gelatinous or sweet food for people?)
This KII took 30 minutes.
Key Informant Interview, August 09: Harar Municipal Building
In this case, this man was given a condensed interview. He is Muslim and spoke English.
Do you have opinions about hyena management?
Hyenas are part of our heritage. He noted that the current hyena population is growing and that more hyenas could be a problem in case of future food shortage. The population growth has occurred because of food sources in the city. People who feed hyenas for tourists gain income.
Harar occasionally poisons feral dogs. The last time was three years ago when over 300 were killed. There is concern that if hyenas can locate the dog carcasses, they may also be poisoned.
This can be a problem if poisoned dogs are not quickly located or if carcasses can be dug-up. To reduce the chance for the latter, dog remains are dropped in a deep hole and covered with lime. Lime speeds up decomposition and limits hyena access. There is concern to manage dog killing carefully so other scavenging species are not affected by poison. Dog killing is done to limit the feral dog popu…
There is no policy concerning hyenas. The hyena population appears to be increasing; you can see them even in the early evening in Harar. There are no data on the hyena population, however. Studies involving collaring hyenas are welcomed.
Other aspects of hyenas:
This respondent has lived in Harar all his life. He has never seen a person attacked, but says there have been rumors that a child was taken in recent times.
There are childhood stories among the local Muslims that hyenas eat jinis (evil spirits). Hyena vomit may contain jini remains. If a dead hyena is found, people may try to cut off the eyebrow and affix it on their upper arm; this protects you against attack from jinis.
We asked if people living 30-40 km from town could have similar attitudes about hyenas, noting that pastoralists in remote places may prefer to kill hyenas. The respondent said, in his view, the attitudes of city people in Harar are typically shared by those living in rural areas.
We mentioned that people in Mekelle mentioned hyena association with budas. The respondent said that some people in Harar also believe in budas.
The respondent said that Harar will be moving from the current neighborhood dumpster system for solid waste disposal to a new system where household waste will be collected door-to-door and then transported to city landfills. He noted that this may upset the hyena dynamic because the garbage will be centralized, and this may favor a few clans over others. Altered feeding conditions for hyenas may…
This KII took 35 minutes.
Key Informant Interview, August 10: Official from Harari Research Group who oversees public health.
This man was given the condensed interview (questions 6 & 7); conducted in Harari at the Harari Regional State research facility.
Below is a summary covering his “personal opinions on hyena management” and “any other issues:”
There is poor hyena management. There is a lack of coordination between veterinary workers and the urban stray dog-killing program.
Dogs are periodically killed to reduce disease and other risks to people. About 400 dogs are killed during a campaign. The last campaign was conducted 3 years ago.
Strychnine is used to poison dogs with bait—a big concern for public health because it can also pollute air and water. There have been no cases of associated human effects from strychnine, however. Need an alternative technology. Rabies is rare among animals and people; mongoose and foxes are the likely agents bringing rabies to Harar.
When dogs die of poisoning, the danger is that hyenas will die when they eat the dead dogs. Some dogs die almost immediately from the poison while others linger and hide in the narrow alleyways of the city, where their carcasses can be found by hyenas.
Research is needed on hyena ecology including the food chain and habitat use. KII took 35 min
Focus Group Discussion: Urban Women of Harar, August 10
This FGD was held at the Wonderland Hotel. The group totaled 7. The ages ranged from 18 to 45, but this is speculation since they did not want to tell their ages. Most of the women appeared relatively affluent. They were well-educated on average; one completed 9th grade, four had diplomas, and two had completed 12th grade. Six were Muslim and two were Orthodox Christian. All were government worke…
Summary of Main Points:
Hyenas do not attack or eat people; every night we see hyenas on our way home from work. We have not heard of a hyena attack on people for over 10 years. In one case a pregnant woman died after seeing a hyena.
People learn about hyenas from elders and then personal experience. Hyenas are one of the most important tourist aspects of Harar city. Hyenas are poorly managed, ignored by the city administration, and are uncared for. This should change; hyenas should also get veterinary attention. They should be protected. Hyenas are only used for income by a few individuals called the “hyena men.”
Hyenas are important to keep evil spirits away from the city.
This FGD took 60 min.
Focus Group discussion: Harari police (August 11).
There were three participants (two men and one woman). No individual data were recorded. This FGD was condensed (questions 6 and 7 only). Data were reviewed for past several years, and only 2 hyena attacks on people (babies) have been recorded. In contrast, wild cats (unspecified) attacked 5 people over the same time frame. Livestock losses are not reported.
Hyenas in Harar have been “domesticated.” In contrast, there are smaller towns (Kersa, Gara Muleta, Kombolcha) up to 40 km from Harar where hyenas are wild and may attack livestock or people. Research is needed to discover why there is this difference from the Harar hyenas.
This FGD took about 20 minutes.
Focus Group Discussion: Peri-Urban Farmers (August 11).
The 10 participants included 9 men and 1 woman. The men were chewing chat. Ages ranged from 25 to 39. Most had significant formal education, ranging from fifth grade to two years of college. All were Muslim. Three were government workers while the rest were farmers. One man was single and everyone else was married. The numbers of people per household varied from two to 12. All were born in this v…
Summary of Main Points:
Hyenas often visit us without attacking our livestock. Very rarely do hyenas attack people; one case involved an infant. Hyenas have dens in our agricultural land. Hyenas can take revenge so we are careful not to attack them. Hyenas are known by our community over many generations.
If a hyena dies naturally, others may eat it after a week. But if a hyena “made a mistake” and killed a person, the others will kill and eat it right away. Hyenas make different sounds when they see jinis.
We need the number of hyenas to increase because they keep the bad spirits away; hyenas also take away dead animals and help us clean the village.
Overall, we coexist peacefully with hyenas; hyenas have never been our enemy. This FGD took about 60 minutes.
Key Informant Interview: a “hyena man” of Harar. (Aug 12)
We met this person on his small farm outside of Harar. He showed us a wedding photo of someone we knew, and he has a hyena in a small shed on his property. He is now retired. His son has taken over his role in recent years.
Summary of Main Points:
He was born in Harar. He has a third grade education. He has 8 family members and makes his living from farming (chat is a good money maker). He was the hyena man for > 25 years, and he retired 3 years ago in 2014. He has fed hyenas night and day, even when no tourists were present. The hyenas came to expect him to feed them. The money he made from hyena feeding was similar to the costs for buyin…
He proposed that the breeding places of hyenas need to be protected. The hyenas help clean the city and keep the jinni away from people. “Breeding dens” should be built (on public land) and kept safe. Hyena breeding (or denning) sites on private farmland are hard to protect. The numbers of hyena are decreasing because of urbanization.
This KII took about 45 minutes.
Opportunistic Informal Roadside Chats (August 13)
On the way back from the Babila Elephant Sanctuary, about 40 km from Harar, we encountered a few young, Muslim Oromo herders. This was in a pastoral area. We asked them about hyenas. They replied that there were hyenas around, and that hyenas preyed on their livestock. Hyenas do not attack people, however. They also believed that hyenas are important to consume evil spirits.
This dialogue took about 5 minutes.
Focus Group Discussion: Urbanites mingling around Harar butcher shops in the evening (August 13)
Of the 8 participants, there were 7 males and one woman. Ages were not listed, but they seemed to mostly be in their 20s; one man might have been 40. Education level varied from 4th grade to 11th grade. All were Muslims. Two were butchers, the woman was a student, one was a police officer, and four were daily laborers. Three were married and five were single. Number of people per household ranged…
Summary of Main Points:
Hyenas sometimes meet people face-to-face in the narrow streets of Harar at night. Hyenas may bump people as they pass but they want to escape. If a person is carrying meat, the hyena may follow until you share some meat with him. People consider hyenas a friend in Harar. Hyenas eat jinis; after this they vomit. If there are more hyenas there will be fewer jinis.
If a person is attacked by a hyena, it is a hyena that travels alone, not in a group of hyenas. If meat is poisoned, the hyena knows and will not eat it. People learn from elders, family, and friends about how to behave around hyenas. We are not taking care of hyenas as citizens; everyone should feel responsible to stop abusing hyenas. Kids throw stones at hyenas because they do not know better.
This FGD took about 45 minutes.
Opportunistic and Very Brief Conversations with Shopkeepers and a Pedestrian in the small town of Kersa.
The town of Kersa is about 7 km SW of Harar. Kersa was mentioned by the Harar police as a location where hyena behavior differs from that in Harar. We decided to stop for a few moments as we passed through Kersa to see what some locals thought.
One young woman shopkeeper said she had lost one goat to hyenas. When people see a hyena, they run.
One man on the street said that hyenas feed at the local waste dump. If there is not enough garbage hyenas will then eat livestock.
Another young male shopkeeper: Sometimes there is predation on sheep and goats. There are no attacks on people.
This dialogue took about 5 minutes.
Arba Minch Area, August 16-19 [Translators Dr. Gidey Yirga (Nec Sar scouts) and Mr. Mateos Mersa (all else)] Note: the major ethnic designation for residents here is “Gamo.”
Key Informant Interview: Two Officials with Sanitation Department of Arba Minch Municipality (Aug 16)
The two men were subjected to a condensed interview (questions 6 and 7) preempted by a question about the extent that hyenas enter Arba Minch town.
Summary of Key Points:
No, hyenas do not regularly enter the town. This is uncommon. They scavenge for dead animals and feed at abattoirs. Howls can be heard at night, but they are not a problem. No attacks of any kind. We promote sanitation, but now we still have an open dumping system. We are starting a three-year project to prepare a landfill and collection system. Now we have some compost sites. The new landfill wi…
The population of Arba Minch is now around 140,000. There is some concern about stray dogs in the city. If needed, stray dogs are hunted by professionals. Dog killing may occur when there is a regional or zonal alert for rabies, for example.
This KII took 15 minutes to complete.
Key Informant Interview: Employee at Nech Sar National Park (August 16)
We had an opportunity to speak with a man who has held his Park position for about 10 years. We asked him about management challenges at the park prior to having a focus group with park staff.
Summary of Key Points:
The biggest problem is that the boundaries of the park have not been legally established. Because of this, the park only has annual management plans and lacks a long-term management plan. The lack of the latter means that Nec Sar is unable to secure external support to pursue objectives. The other problem is that lack of secure boundaries means that encroachment by local user groups is a problem …
This KII lasted 20 minutes.
Focus Group Discussion: Game scouts and office staff of Nec Sar Park (August 16)
Of the 7 participants, 5 were men. Ages varied from 27 to 58 years. Education varied from 6th grade to diploma holders. Four followed the protestant religion, while 3 were Ethiopian Orthodox. Five were game scouts while the 2 women were office staff (archives and secretary). All were married. Family size ranged from 3 to 15. Years in the area varied from 8 to 26. A slightly altered and condensed …
Summary of Key Points:
The hyena population in the park is large, but it may be declining. Deforestation and pastoral encroachment may be damaging hyena habitat and den sites. Den locations may be shifting. They guess there may be 7 clans, but no research to support that estimate. Livestock depredation by hyenas is common, and there may be retaliatory killings of hyenas by pastoralists. One cultural point among the pas…
The scouts contend that hyenas may indeed visit Arba Minch town to feed on garbage near the park boundary. They may also prey on livestock outside of the park also.
Personal opinions on hyenas included the following: One scout lost 2 cattle and 3 calves to hyenas several years ago. Fifty years ago, a man sleeping outside lost part of his brain to a hyena, but he lived another 43 years. Hyena body parts are used to address spiritual issues like buda. If a hyena whoops at night, it can signify that an important person has or will die soon. One example was when…
To better-manage hyenas, habitat conservation is needed. Hyenas are very important in promoting sanitation in the park; they help preserve a balance in the ecosystem. When asked about the emphasis that hyenas put on livestock versus “natural” food sources, the group said that if hyenas are distant from human settlements, they will preferentially feed on “natural” food sources. If they live close …
This FGD lasted about 60 minutes.
Focus Group Discussion: Urban citizens (August 16)
The 12 participants were comprised of 5 females and 7 males. The ages ranged from 20 to 35. Education varied from seventh grade through BSc degree holders. Two were members of the Orthodox religion while the rest were protestant. Livelihoods included a pastor, a businessman, lecturer, students, a research assistant, a weaver, research assistant, and a government employee. Five were married. Peopl…
Summary of Key Points:
Hyenas do attack livestock and people. Spiritual factors related to hyena can disrupt childhood. Hyenas are social animals and in some local cultures hyenas contribute legends. Hyenas call each other when they feed. If people hear the call and see the hyena, hyenas may attack the people. Hyenas have a “special spirit” that enables people to sleep deeply. There are people who believe hyenas are co…
Better managing hyenas is good. They can be domesticated for tourist attraction. Because they are scavengers they clean the environment. Hyenas do not attack livestock or people if their home range is undisturbed.
There was a high population of hyena 9 years ago. There are two species of hyena, spotted and striped. There may be over 6,000 hyenas in the region. To better manage hyenas, illegal hunting can be reduced. In addition, reducing human interference in hyena habitat.
Focus Group Discussion: Rural Community on Outskirts of town near airport (August 17)
Of the 9 participants, three were women. Ages varied from 20 to 40. Education was not given for three people, but everyone could write and sign their names. The six that noted education varied from 7th to 12th grade. Five were Ethiopian Orthodox followers while the rest were protestants. Livelihoods did not mention farming but included laborer (4), cooks (3), a manager, and a security guard. The …
Summary of Key Points:
Most felt that they had little direct experience with hyenas. They tend to regard hyenas negatively because they attack livestock, dogs, etc. They may enter homes to get food and are known to kill human babies that are outside at night. The bad breath of hyenas also affects human babies. They have been known to kill a man. Hyenas can be a “horse of shaytan.” Hyena feces can make people faint. Som…
Opinions about hyenas are negative because of points above. There are people in this community who believe in the evil eye and associate hyenas with bad spirits. However, the hyena plays a positive role in cleaning the environment. Some awareness raising (community education) about the importance of hyenas may help change attitudes and improve hyena management. The group felt the hyena population…
This FGD took about 60 minutes to complete.
Focus Group: Urban Orthodox Christians at the Zebib Hotel (August 17)
Of the 12 participants, two were women. Ages ranged from 21 to 50. Education varied from a “basic education” to completion of 10th grade and two had master’s degrees. All were followers of the Ethiopian Orthodox Church. Four young men did not state their place of employment, and may have been unemployed. The two women were house cleaners, and the men were waiters, students, and a government emplo…
Summary of Key Points:
None of the participants has ever had a direct interaction or experience with hyenas.
There was some indirect learning about hyenas by the group. There was mention of the evil-eye and buda connection to hyenas, as well as hyenas being the “horse of shaytan.” That hyenas can be aggressive to people was reported from facebook. Hyenas may attack and kill children.
Hyenas are nocturnal. They produce “dangerous sounds” when they are in a group. People may die when they see the hyena.
Personal opinions about hyenas—overall—tended to be negative. Hyenas are a bad wildlife species because they can attack people, kill children, and kill livestock. Hyenas are useful, however, because they clean the environment and provide ecological balance. Hyenas are basically a “good animal” that will not attack people unless people enter the hyena’s home range. Hyenas can create psychological …
The population of the hyena is declining because of human influences on habitat, forest degradation, and encroachment of people on natural areas. The best way to have a positive effect on hyena numbers is to better manage and restore their natural habitats.
This FGD lasted about 60 minutes.
Focus Group: Urban Muslims at the Zebib Hotel (August 18)
Of the 13 participants, 5 were women. Ages ranged from 20 to 47. Education varied from 4th grade to 12th grade plus two years. All were followers of the Muslim faith. Employment included service as housewives, business men/women, waiter, cashier, guard, driver, student, machine operator, and daily laborer. Seven were married. People per household varied from 1 to 8. Time spent in Arba Minch range…
Summary of Key Points:
Personal experiences with hyenas included: Some have seen hyenas, some have lost livestock (sheep) to hyenas, around Chencha hyenas have spiritual value, in 1988 a group of hyenas fought with a person, the feces of hyenas can be used in traditional medicine.
Indirect experiences include observations from television and elsewhere that hyenas can be domesticated; hyenas kill livestock in urban areas, in remote areas hyenas may eat human corpses, around Butasira there is a captive breeding program.
Personal opinions about hyenas: Overall, the group assessment is negative about hyenas—they are enemies of human beings. In rural areas, hyenas can act as a cleaner of the environment, but this is less important in urban areas; hyenas are intelligent and can communicate with people.
Personal opinions about hyena management: Communities much manage hyenas like all wildlife. Reforestation is needed to improve hyena habitat. Artificial breeding sites can be built. Need better management of the home range.
This FGD took 60 minutes.
Key Informant Interview: veterinarian in the Gamu Gofa Zone (Aug 18).
This man has worked in his current job for 8 years.
Summary of Key Points:
Society here considers hyenas as dangerous; negative attitudes prevail. The hyena population at present seems to be low. Hyenas do not visit Arba Minch town. Zoonotic research on hyenas is needed. Hyena skin can be used for traditional medicine. Stray dogs are a problem in Arba Minch as elsewhere in urban Ethiopia. There is an annual program for dog control involving the use of strychnine poison.…
There is no understanding of potential contributions of hyenas to rabies here. There is a routine effort to vaccinate dogs against rabies in the region. The last rabies outbreak warning in this region occurred in April.
This KII took 20 minutes.
Focus Group Discussion: Rural Community at Chencha town, about 40 km in the Mountains Outside of Arba Minch—Aug 19 (this site was nominated by Dr. Simon of AMU as he felt rural people would know more about hyenas in this locale than would urban residents)
Of the 13 participants, three were women. Ages ranged from 23 to 60 years. Education varied from no formal education (3) to 10+4 years. The religions followed included protestant (3) and Orthodox.
Employment included unemployed (1), retired (1), and service as government workers (3), weavers (4), farming (2), housewife (1), other (1). Ten were married. People per household varied from 1 to 8. Time spent in this town ranged from 4 to 60 years.
Summary of Key Points:
Hyenas are found in this area. They live in several types of forest. The hyena population is in decline. This decline is due to dog-poisoning campaigns. Hyenas sometimes visit this small town to scavenge.
Hyenas clean the environment, but they also attack and kill livestock. Society respects hyenas here; people must show respect to hyenas to avoid hyenas attacking their livestock.
Hyenas can live in caves (heard from other locals) and provide sanitation services (heard in the media). Rumors include that hyenas can hide among large enset plants on farms and then kill people. For certain ethnic groups, if a person dies then hyenas may cry at night in reply to that death—this is a good omen.
Opinions: Some felt that hyenas are simply wild animals—neither bad nor good in terms of the spirit world. It is a bad animal for society because it kills livestock. It is good because it cleans the environment. Some people in the community link hyenas to the evil eyed people (buda). While opinions on specifics are a bit mixed, overall opinion on hyenas is negative.
Opinions on hyena management: Fewer hyenas is good. Hyena numbers are down due to dog poisoning, forest degradation, and urbanization. No need to boost hyena numbers through management interventions because their negative features outweigh the positive.
This FGD took 45 minutes.
ADDIS ABABA AREA, AUGUST 21-25 (Translator: NA)
The final leg of our trip was in Addis. No formal data collection for the human component occurred here.
END OF TRIP NOTES
